# Supplementary material
Source: Elsevier journal article supplement (https://pure.iiasa.ac.at/id/eprint/14483/2.haspreviewThumbnailVersion/mmc1.pdf)

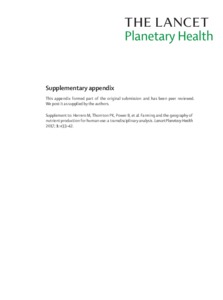

Supplement: mmc1 [file mmc1.pdf]
